# Supplementary material
Source: PubMed Central journal article supplement (PMC5657566)
Supplement: NIHMS888189-supplement.pdf [file NIHMS888189-supplement.pdf]

**Appendix**  
**Transactions at a Northeastern Supermarket Chain:**  
**Differences by Supplemental Nutrition Assistance Program Use**  
**Franckle et al.**

**Appendix Table 1.** Food and Beverage Groups and Subgroups in Sales Database

| Category                                   | Includes                                                                                                                                                                                                                                                                                                | Excludes                                                                                                       | # of items |
|--------------------------------------------|---------------------------------------------------------------------------------------------------------------------------------------------------------------------------------------------------------------------------------------------------------------------------------------------------------|----------------------------------------------------------------------------------------------------------------|------------|
| <b>Beverages</b>                           |                                                                                                                                                                                                                                                                                                         |                                                                                                                |            |
| 1. Sugar-sweetened beverage                | Any sugar-sweetened beverage. Examples include: soda, sport drink/enhanced drink, energy drink, sweetened tea or coffee drink, fruit juice/juice drink with added caloric sweetener, vegetable juice with added sugar, smoothie, hot chocolate, tonic water, bar mix, flavored milk, or milk substitute | Meal replacement or nutrition supplement (e.g., Boost, Ensure), juice intended for cooking (e.g., lemon juice) | 2,909      |
| 2. Lower-calorie beverage                  | Diet, light, or low-calorie versions of sugary drinks or fruit juice                                                                                                                                                                                                                                    |                                                                                                                | 470        |
| 3. Unsweetened beverage                    | Examples include: unflavored water, seltzer, or soda water; coffee, tea, tea bags                                                                                                                                                                                                                       |                                                                                                                | 1,678      |
| 4. Alcohol                                 | Alcoholic beverage intended for drinking. Examples include: beer, wine, liquor                                                                                                                                                                                                                          | Cooking wine                                                                                                   | 8,418      |
| 5. 100% fruit juice                        | 100% fruit juice                                                                                                                                                                                                                                                                                        |                                                                                                                | 572        |
| <b>Fruits, vegetables, beans, and nuts</b> |                                                                                                                                                                                                                                                                                                         |                                                                                                                |            |
| 6. Fruit                                   | Fresh, frozen, canned, or pureed fruit                                                                                                                                                                                                                                                                  | Maraschino cherry, fruit topping/sauce, fruit snack, dried fruit                                               | 1,535      |
| 7. Vegetable                               | Fresh, frozen, canned, dried, or pureed vegetable; 100% vegetable juice                                                                                                                                                                                                                                 | Dried herbs                                                                                                    | 2,265      |
| 8. Bean                                    | Examples include: black bean, black-eyed pea, chickpea, kidney bean, lentil, lima bean, navy bean, pinto bean, soy bean, split bean, white bean                                                                                                                                                         |                                                                                                                | 422        |
| 9. Nut or seed                             | Nut, seed, or nut butter                                                                                                                                                                                                                                                                                | Candied or chocolate-covered nut                                                                               | 612        |
| <b>Main protein sources</b>                |                                                                                                                                                                                                                                                                                                         |                                                                                                                |            |
| 10. Red meat                               | Beef, ham, lamb, pork, veal, game meat, ground meat, or meat patty                                                                                                                                                                                                                                      | Organ meat                                                                                                     | 1,289      |
| 11. Poultry                                | Chicken, turkey, duck, ground poultry, or poultry patty                                                                                                                                                                                                                                                 |                                                                                                                | 346        |
| 12. Seafood                                | Fish, shellfish                                                                                                                                                                                                                                                                                         |                                                                                                                | 960        |
| 13. Processed soy/meat alternatives        | Tofu, tempeh, seitan, and other meat alternatives (e.g., patties, burgers, sausages, deli meat)                                                                                                                                                                                                         |                                                                                                                | 126        |

**Appendix**  
**Transactions at a Northeastern Supermarket Chain:**  
**Differences by Supplemental Nutrition Assistance Program Use**  
**Franckle et al.**

|                                  |                                                                                                                                                                                              |                                                                  |       |
|----------------------------------|----------------------------------------------------------------------------------------------------------------------------------------------------------------------------------------------|------------------------------------------------------------------|-------|
| 14. Processed meat               | Deli meat (processed roast beef, turkey, chicken, ham, salami, bologna), cured meat, bacon, sausage, hot dog, bratwurst                                                                      |                                                                  | 1,198 |
| 15. Eggs/egg dishes              | Eggs/egg dishes                                                                                                                                                                              |                                                                  | 135   |
| <b>Grains</b>                    |                                                                                                                                                                                              |                                                                  |       |
| 16. Bread                        | Examples include: loaf bread, sandwich thin, roll, tortilla, taco shell, wrap, pita, specialty bread (e.g., brioche, baguette), hamburger or hot dog bun, pizza crust, bagel, English muffin | Biscuits                                                         | 1,490 |
| 17. Cereal                       | Ready to eat cereal, hot cereal (e.g., oatmeal, grits, farina), granola                                                                                                                      |                                                                  | 1,021 |
| 18. Pasta, rice, or other grain  | Examples include: pasta/noodle, rice, amaranth, barley, buckwheat, bulgur, whole cornmeal, emmer, faro, kamut, millet, whole rolled oats, quinoa, flour, etc.                                |                                                                  | 1,648 |
| <b>Dairy</b>                     |                                                                                                                                                                                              |                                                                  |       |
| 19. Milk or milk substitute      | Unflavored liquid or powdered milk, soy milk, almond milk, rice milk                                                                                                                         | Coconut milk, buttermilk, condensed milk, evaporated milk, cream | 452   |
| 20. Yogurt                       | Yogurt, kefir                                                                                                                                                                                |                                                                  | 603   |
| 21. Cheese                       | Examples include: Swiss cheese, cream cheese, cottage cheese, ricotta cheese, cheddar, mozzarella, feta                                                                                      | Cheese sauce                                                     | 1,238 |
| <b>Fats and oils</b>             |                                                                                                                                                                                              |                                                                  |       |
| 22. Fat or oil - solid           | Examples include: butter, margarine, coconut oil                                                                                                                                             |                                                                  | 128   |
| 23. Fat or oil - liquid          | Examples include: olive oil, canola oil, Pam spray                                                                                                                                           |                                                                  | 197   |
| <b>Desserts, candy, snacks</b>   |                                                                                                                                                                                              |                                                                  |       |
| 24. Candy                        | Candy, chocolate, gum, or mints. Examples include: gummy bears, peanut butter cups                                                                                                           | Sugary topping (e.g., sprinkles, chocolate sauce)                | 2,457 |
| 25. Cold or frozen dessert       | Examples include: ice cream, frozen yogurt, whipped cream, popsicles                                                                                                                         |                                                                  | 1,261 |
| 26. Sweet or salty snack         | Examples include: chips, pretzels, popcorn, granola/cereal bars, crackers, snack mix, pudding, dried fruit                                                                                   |                                                                  | 3,582 |
| 27. Sweet bread, cake, or cookie | Examples include: sweet loaf (e.g., banana bread), cake, cinnamon roll, croissant, Danish, doughnut, muffin,                                                                                 |                                                                  | 3,809 |

**Appendix**  
**Transactions at a Northeastern Supermarket Chain:**  
**Differences by Supplemental Nutrition Assistance Program Use**  
**Franckle et al.**

|                                             |                                                                                                                                                                                                                                                                            |                                              |        |
|---------------------------------------------|----------------------------------------------------------------------------------------------------------------------------------------------------------------------------------------------------------------------------------------------------------------------------|----------------------------------------------|--------|
|                                             | breakfast pastry, cookie, brownie, pie, tart                                                                                                                                                                                                                               |                                              |        |
| <b>Prepared foods</b>                       |                                                                                                                                                                                                                                                                            |                                              |        |
| 28. Condiments, sauces, and salad dressings | Examples include: dip, spread, salad dressing, hummus, guacamole, marinara sauce, seasoning packet for sauce/dressing/gravy, condiments, cheese sauce                                                                                                                      |                                              | 2,880  |
| 29. Soup                                    | Canned, boxed, or frozen soup, soup mix, broth, base, ramen, chili                                                                                                                                                                                                         |                                              | 856    |
| 30. Pizza                                   | Frozen/refrigerated pizza, pizza ingredients sold as a kit                                                                                                                                                                                                                 | Pizza ingredients sold separately, hot pizza | 321    |
| 31. Convenience foods                       | Prepared or packaged foods to be eaten away from the store (e.g., frozen, boxed, or canned meal, entrée, or side)                                                                                                                                                          |                                              | 4,734  |
| 32. Convenience foods (hot)                 | Hot prepared foods not eligible for purchase with SNAP                                                                                                                                                                                                                     |                                              | 80     |
| <b>Other</b>                                |                                                                                                                                                                                                                                                                            |                                              |        |
| 33. Other - food                            | Herb, spice, or seasoning; baking ingredient (e.g., sugar, baking powder, vanilla extract); juice intended for cooking (e.g., lemon juice); cooking wine; organ meats; non-fluid, sweetened, or cultured milk products (e.g., evaporated milk, buttermilk, condensed milk) |                                              | 3,027  |
| 34. Other - nonfood                         | Inedible grocery items (e.g., paper towels)                                                                                                                                                                                                                                |                                              | 61,605 |

SNAP, Supplemental Nutrition Assistance Program
